# Supplementary material for: Artisanal Gem Mining in Brazil: A Source of Genotoxicity and Exposure to Toxic Elements
Source: MDPI journal article supplement (doi:10.3390/ijerph20032510), 2023-01-31
Supplement: s1 [file s1]

**Table S1.** Concentrations of trace elements (mg kg<sup>-1</sup>) in the analyzed samples (soil, soil dust, and stonedust) and comparison with reference values (mean ± SD)

| Element | Mine       | Soil         | Soil dust      | Stonedust      | COPAM     |            | CETESB    |            |
|---------|------------|--------------|----------------|----------------|-----------|------------|-----------|------------|
|         |            |              |                |                | QR<br>V   | PV         | QR<br>V   | PV         |
| Ba      | Bode       | 32.22±0.38   | 1.00 ±0.10     | 0.16±0.13      |           |            |           |            |
|         | Pirineu    | 68.28±0.53   | 0.10±0.01      | 0.11±0.00      |           |            |           |            |
|         | Pinheira   | 27.32±0.20   | 0.10±0.01      | 0.12±0.01      | 93.0<br>0 | 150.0<br>0 | 75.0<br>0 | 120.0<br>0 |
|         | Lajedo     | 45.40±0.34   | 1.49±0.03      | 1.44±0.03      |           |            |           |            |
|         | Marmiteira | 104.18±0.88  | 5.30±0.04      | 11.70±0.03     |           |            |           |            |
| Cd      | Bode       | 0.33±0.00    | 0.42±0.01      | 0.69±0.01      |           |            |           |            |
|         | Pirineu    | 0.53±0.01    | 0.85±0.03      | 0.72±0.01      |           |            |           |            |
|         | Pinheira   | 0.33±0.00    | 0.81±0.02      | 0.50±0.01      | 0.40      | 1.30       | 0.50      | 1.30       |
|         | Lajedo     | 0.45±0.01    | 0.73±0.01      | 0.52±0.01      |           |            |           |            |
|         | Marmiteira | 0.46±0.01    | 0.67±0.02      | 0.97±0.02      |           |            |           |            |
| Hg      | Bode       | 133.81±18.77 | 1576.67±111.87 | 840.79±37.57   |           |            |           |            |
|         | Pirineu    | 180.15±40.67 | 339.04 ± 22.46 | 185.16 ± 26.24 |           |            |           |            |
|         | Pinheira   | 92.32±28.94  | 916.18 ±64.66  | 401.63 ± 28.52 | 0.05      | 0.50       | 0.05      | 0.50       |
|         | Lajedo     | 12.00±0.02   | 13.00±0.001    | 15.47 ± 0.01   |           |            |           |            |
|         | Marmiteira | 45.98±12.76  | 21.47 ± 0.02   | 8.21 ± 0.22    |           |            |           |            |
| Zn      | Bode       | 61.50 ± 0.56 | 69.75 ± 0.92   | 4.79 ± 0.32    |           |            |           |            |
|         | Pirineu    | 78.25 ± 0.67 | 104.54 ± 1.01  | 94.16 ± 0.89   | 46.5<br>0 | 300.0<br>0 | 60.0<br>0 | 86.00      |
|         | Pinheira   | 22.21 ± 0.29 | 82.36 ± 1.13   | 43.16 ± 0.59   |           |            |           |            |
|         | Lajedo     | 23.24 ± 0.28 | 132.77 ± 1.28  | 33.98 ± 0.52   |           |            |           |            |

|        |             |                  |             |
|--------|-------------|------------------|-------------|
| Marmit | $61.63 \pm$ |                  | $45.03 \pm$ |
| a      | 0.83        | $36.50 \pm 0.29$ | 0.38        |

---

\*QRV/PV (Quality Reference Value/Prevention Value) COPAM and CETESB regulations.

**Table S2.** Concentration of trace elements (mg kg<sup>-1</sup>) in the analyzed soil samples and comparison with reference values (mean  $\pm$  SD)

| Element | Mine     | Soil              | Soil dust          | Stonedust          | ATSDR |
|---------|----------|-------------------|--------------------|--------------------|-------|
|         |          |                   |                    |                    | QRV   |
| Be      | Bode     | 2.74 $\pm$ 0.03   | 11.33 $\pm$ 0.47   | 20.7 $\pm$ 0.2     | 15.00 |
|         | Pirineu  | 41.3 $\pm$ 0.4    | 71.2 $\pm$ 1.1     | 28.6 $\pm$ 0.6     |       |
|         | Pinheira | 3.04 $\pm$ 0.05   | 26.94 $\pm$ 0.29   | 9.31 $\pm$ 0.11    |       |
|         | Lajedo   | 5.33 $\pm$ 0.10   | 40.77 $\pm$ 0.92   | 38.37 $\pm$ 0.31   |       |
|         | Marmita  | 4.76 $\pm$ 0.05   | 17.59 $\pm$ 0.52   | 34.62 $\pm$ 0.29   |       |
| Mn      | Bode     | 161.00 $\pm$ 0.89 | 106.77 $\pm$ 1.29  | 504.95 $\pm$ 7.13  | 330   |
|         | Pirineu  | 958 $\pm$ 5.4     | 1257 $\pm$ 12.9    | 470 $\pm$ 4.7      |       |
|         | Pinheira | 539.31 $\pm$ 4.79 | 761.78 $\pm$ 11.53 | 395.56 $\pm$ 4.09  |       |
|         | Lajedo   | 360.63 $\pm$ 2.25 | 185.09 $\pm$ 2.91  | 178.79 $\pm$ 2.54  |       |
|         | Marmita  | 413.29 $\pm$ 3.12 | 707.50 $\pm$ 5.98  | 1600.49 $\pm$ 9.37 |       |
| U       | Bode     | 19.33 $\pm$ 0.21  | 3.67 $\pm$ 0.01    | 4.90 $\pm$ 0.02    | 3     |
|         | Pirineu  | 58.09 $\pm$ 0.62  | 32.04 $\pm$ 0.34   | 4.61 $\pm$ 0.01    |       |
|         | Pinheira | 24.82 $\pm$ 0.31  | 12.08 $\pm$ 0.09   | 4.82 $\pm$ 0.01    |       |
|         | Lajedo   | 19.88 $\pm$ 0.32  | 4.43 $\pm$ 0.02    | 4.31 $\pm$ 0.01    |       |
|         | Marmita  | 102.00 $\pm$ 1.06 | 9.00 $\pm$ 0.03    | 13.56 $\pm$ 0.08   |       |
| Zn      | Bode     | 61.50 $\pm$ 0.56  | 69.75 $\pm$ 0.92   | 4.79 $\pm$ 0.32    | 60    |
|         | Pirineu  | 78.25 $\pm$ 0.67  | 104.54 $\pm$ 1.01  | 94.16 $\pm$ 0.89   |       |
|         | Pinheira | 22.21 $\pm$ 0.29  | 82.36 $\pm$ 1.13   | 43.16 $\pm$ 0.59   |       |
|         | Lajedo   | 23.24 $\pm$ 0.28  | 132.77 $\pm$ 1.28  | 33.98 $\pm$ 0.52   |       |
|         | Marmita  | 61.63 $\pm$ 0.83  | 36.50 $\pm$ 0.29   | 45.03 $\pm$ 0.38   |       |

\*QVR (Quality Reference Value) ATSDR regulation.

**Table S3.** Frequency of MN, BN, and KL in control and occupationally exposed groups (Mean  $\pm$  SD, Range.)

| <b>Group</b>   | <b>Number of subjects</b> | <b>Micronucleus (MN)</b>   | <b>Binucleated (BN)</b>      | <b>Karyolysis (KL)</b>        |
|----------------|---------------------------|----------------------------|------------------------------|-------------------------------|
| <b>Control</b> | 17                        | 0.35 $\pm$ 0.61<br>(0 – 2) | 4.18 $\pm$ 1.70<br>(2 – 8)   | 3.47 $\pm$ 1.91<br>(1 – 9)    |
| <b>Miners</b>  | 22                        | 2.50 $\pm$ 2.65<br>(0 – 9) | 12.86 $\pm$ 7.27<br>(0 – 26) | 17.91 $\pm$ 12.86<br>(0 – 59) |

**Table S4.** Concentration ( $\mu\text{g L}^{-1}$ ) of chemical elements in urine of exposed group (minimum, maximum, mean, median and percentiles 10%, 25%, 75%, and 90%).

| Element | Minimum   | Maximum    | Mean     | Median   | Percentile |          |           |           |
|---------|-----------|------------|----------|----------|------------|----------|-----------|-----------|
|         |           |            |          |          | 10%        | 25%      | 75%       | 90%       |
| Li      | 3.88      | 165.26     | 30.92    | 20.70    | 7.70       | 14.87    | 32.75     | 53.83     |
| Be      | 0.09      | 0.61       | 0.25     | 0.25     | 0.15       | 0.18     | 0.29      | 0.34      |
| Al      | <LOD*     | 115.77     | 33.44    | 29.42    | <LOD*      | 14.45    | 39.00     | 81.76     |
| Ca      | 11.323.17 | 26.6427.46 | 91879.27 | 92284.76 | 34688.51   | 49567.68 | 127851.51 | 143940.68 |
| Cr      | 0.15      | 0.86       | 0.38     | 0.38     | 0.20       | 0.24     | 0.46      | 0.51      |
| Mn      | 0.19      | 4.00       | 0.72     | 0.49     | 0.22       | 0.33     | 0.67      | 1.41      |
| Fe      | 7.87      | 58.46      | 19.65    | 15.25    | 8.91       | 11.86    | 22.42     | 29.13     |
| Co      | 0.23      | 1.03       | 0.64     | 0.65     | 0.37       | 0.45     | 0.86      | 0.99      |
| Ni      | 0.66      | 8.55       | 3.28     | 2.91     | 1.00       | 2.27     | 4.36      | 5.07      |
| Cu      | 32.69     | 88.65      | 59.80    | 58.64    | 43.69      | 48.01    | 67.02     | 80.22     |
| Zn      | 75.06     | 1357.90    | 523.60   | 443.90   | 124.33     | 217.20   | 744.72    | 940.57    |
| As      | 5.14      | 39.02      | 20.44    | 20.67    | 7.37       | 15.84    | 22.79     | 32.32     |
| Se      | 5.98      | 37.52      | 19.72    | 19.45    | 8.26       | 11.21    | 26.28     | 30.94     |
| Sr      | 35.63     | 563.73     | 200.04   | 197.39   | 74.66      | 120.32   | 235.82    | 304.14    |
| Cd      | <LOD*     | 0.43       | 0.18     | 0.14     | 0.02       | 0.09     | 0.29      | 0.37      |
| Cs      | 3.83      | 39.55      | 22.27    | 20.56    | 10.98      | 15.56    | 29.12     | 35.23     |
| Ba      | 0.39      | 30.37      | 6.49     | 4.28     | 0.80       | 1.59     | 9.87      | 12.22     |
| Hg      | 0.22      | 11.50      | 3.74     | 2.47     | 1.11       | 1.48     | 6.33      | 7.33      |
| Pb      | <LOD*     | 13.88      | 2.79     | 1.86     | <LOD*      | 0.19     | 4.57      | 5.97      |
| U       | <LOD*     | <LOD*      | <LOD*    | <LOD*    | <LOD*      | <LOD*    | <LOD*     | <LOD*     |

\* LOD indicates values below the detection limit.

**Table S5.** Concentration ( $\mu\text{g L}^{-1}$ ) of chemical elements in urine of control group  
(minimum, maximum, mean, median and percentiles 10%, 25%, 75%, and 90%).

| Element | Minimum   | Maximum    | Mean       | Median     | Percentile |           |            |            |
|---------|-----------|------------|------------|------------|------------|-----------|------------|------------|
|         |           |            |            |            | 10%        | 25%       | 75%        | 90%        |
| Li      | 2.37      | 12.33      | 7.46       | 7.82       | 3.82       | 5.19      | 9.70       | 10.97      |
| Be      | 0.04      | 0.30       | 0.13       | 0.12       | 0.06       | 0.09      | 0.16       | 0.23       |
| Al      | <LOD*     | 28.50      | 6.68       | 3.92       | <LOD*      | <LOD*     | 10.99      | 14.20      |
| Ca      | 31.406,32 | 303.139,62 | 130.072,70 | 120.290,45 | 35.240,12  | 72.249,62 | 195.966,41 | 231.884,04 |
| Cr      | <LOD*     | 0.62       | 0.14       | 0.12       | <LOD*      | 0.05      | 0.14       | 0.27       |
| Mn      | <LOD*     | 0.24       | 0.03       | <LOD*      | <LOD*      | <LOD*     | 0.03       | 0.10       |
| Fe      | <LOD*     | 33.63      | 13.04      | 11.27      | 5.73       | 8.82      | 14.04      | 24.12      |
| Co      | 0.19      | 1.61       | 0.47       | 0.41       | 0.20       | 0.27      | 0.48       | 0.74       |
| Ni      | 0.27      | 4.90       | 2.06       | 1.84       | 0.49       | 1.26      | 3.10       | 3.67       |
| Cu      | 15.51     | 46.44      | 31.14      | 33.05      | 20.14      | 25.62     | 36.14      | 41.54      |
| Zn      | 148.39    | 926.08     | 499.20     | 443.87     | 230.10     | 335.97    | 647.77     | 822.18     |
| As      | 2.11      | 49.50      | 13.31      | 11.13      | 5.83       | 6.17      | 17.22      | 20.68      |
| Se      | 10.99     | 94.18      | 31.31      | 26.49      | 15.24      | 17.30     | 33.01      | 54.36      |
| Sr      | 64.22     | 395.94     | 192.62     | 161.46     | 70.74      | 132.37    | 220.04     | 366.96     |
| Cd      | <LOD*     | 0.19       | 0.06       | 0.05       | 0.01       | 0.04      | 0.08       | 0.12       |
| Cs      | 6.58      | 38.20      | 22.73      | 23.71      | 14.80      | 16.84     | 27.39      | 33.44      |
| Ba      | 0.21      | 18.81      | 4.73       | 3.31       | 1.84       | 2.21      | 5.77       | 9.15       |
| Hg      | 0.45      | 2.83       | 1.33       | 1.12       | 0.56       | 0.91      | 1.70       | 2.39       |
| Pb      | <LOD*     | 1.98       | 0.40       | 0.18       | <LOD*      | <LOD*     | 0.65       | 1.09       |
| U       | <LOD*     | <LOD*      | <LOD*      | <LOD*      | <LOD*      | <LOD*     | <LOD*      | <LOD*      |

\* LOD indicates values below the detection limit.

**Table S6.** Blood concentration ( $\mu\text{g L}^{-1}$ ) of chemical elements in exposed group  
(minimum, maximum, mean, median and percentiles 10%, 25%, 75%, and 90%).

| Element | Minimum   | Maximum   | Mean      | Median    | Percentile |           |           |           |
|---------|-----------|-----------|-----------|-----------|------------|-----------|-----------|-----------|
|         |           |           |           |           | 10%        | 25%       | 75%       | 90%       |
| Li      | 0.28      | 3.67      | 0.77      | 0.58      | 0.33       | 0.44      | 0.72      | 0.89      |
| Be      | <LOD*     | 0.45      | 0.17      | 0.11      | <LOD*      | 0.01      | 0.30      | 0.37      |
| Al      | <LOD*     | 23.34     | 3.66      | <LOD*     | <LOD*      | <LOD*     | 3.76      | 14.44     |
| Ca      | 45360.98  | 62664.78  | 54522.24  | 55280.59  | 48129.52   | 52137.47  | 56925.44  | 58538.90  |
| Cr      | <LOD*     | 3.58      | 0.28      | <LOD*     | <LOD*      | <LOD*     | 0.03      | 0.59      |
| Mn      | 8.73      | 17.78     | 12.85     | 13.16     | 8.90       | 10.08     | 14.60     | 16.90     |
| Fe      | 461817.73 | 721983.16 | 587174.01 | 578055.21 | 546741.57  | 556251.12 | 613535.91 | 665096.52 |
| Co      | 0.30      | 0.68      | 0.44      | 0.39      | 0.33       | 0.35      | 0.49      | 0.64      |
| Ni      | <LOD*     | 281.94    | 15.27     | 0.04      | <LOD*      | <LOD*     | 5.49      | 10.25     |
| Cu      | 833.98    | 1403.48   | 1062.64   | 1046.61   | 894.72     | 973.90    | 1136.98   | 1215.32   |
| Zn      | 5377.24   | 8640.76   | 7128.18   | 6973.87   | 6105.91    | 6478.32   | 7942.23   | 8395.99   |
| As      | 0.68      | 2.83      | 1.45      | 1.39      | 0.98       | 1.18      | 1.71      | 1.87      |
| Se      | 37.98     | 65.80     | 53.79     | 54.44     | 44.87      | 47.93     | 58.17     | 63.23     |
| Sr      | 6.35      | 19.93     | 11.18     | 10.69     | 8.45       | 9.10      | 12.63     | 14.61     |
| Cd      | <LOD*     | 0.38      | 0.14      | 0.13      | 0.05       | 0.08      | 0.20      | 0.23      |
| Cs      | 4.00      | 11.64     | 7.46      | 7.22      | 4.88       | 6.05      | 8.84      | 10.38     |
| Ba      | 0.27      | 6.50      | 1.46      | 0.91      | 0.49       | 0.60      | 1.78      | 2.78      |
| Hg      | 0.22      | 4.09      | 0.87      | 0.64      | 0.35       | 0.40      | 1.01      | 1.11      |
| Pb      | 18.60     | 204.26    | 74.26     | 60.11     | 29.74      | 37.78     | 99.27     | 126.80    |
| U       | <LOD*     | <LOD*     | <LOD*     | <LOD*     | <LOD*      | <LOD*     | <LOD*     | <LOD*     |

\* LOD indicates values below the detection limit.

**Table S7.** Blood concentration ( $\mu\text{g L}^{-1}$ ) of chemical elements in control group  
(minimum, maximum, mean, median and percentiles 10%, 25%, 75%, and 90%).

| Element | Minimum   | Maximum    | Mean       | Median     | Percentile |            |            |            |
|---------|-----------|------------|------------|------------|------------|------------|------------|------------|
|         |           |            |            |            | 10%        | 25%        | 75%        | 90%        |
| Li      | 0.02      | 0.61       | 0.34       | 0.36       | 0.17       | 0.21       | 0.47       | 0.56       |
| Be      | <LOD*     | 0.62       | 0.18       | 0.13       | 0.05       | 0.09       | 0.18       | 0.41       |
| Al      | <LOD*     | 123.43     | 7.42       | <LOD*      | <LOD*      | <LOD*      | <LOD*      | 1.07       |
| Ca      | 47,545.59 | 81,846.64  | 55,508.42  | 53,028.06  | 50,464.84  | 51,197.95  | 55,703.05  | 63,491.59  |
| Cr      | <LOD*     | 10.73      | 0.77       | <LOD*      | <LOD*      | <LOD*      | 0.25       | 0.90       |
| Mn      | 6.34      | 18.30      | 10.59      | 10.56      | 6.75       | 9.12       | 11.50      | 13.33      |
| Fe      | 507058.49 | 859,988.76 | 580,573.83 | 559,489.16 | 533,547.60 | 544,316.16 | 585,012.80 | 607,851.48 |
| Co      | 0.25      | 0.59       | 0.36       | 0.34       | 0.30       | 0.32       | 0.43       | 0.46       |
| Ni      | <LOD*     | 32.16      | 3.34       | <LOD*      | <LOD*      | <LOD*      | 1.17       | 9.06       |
| Cu      | 639.90    | 2,512.27   | 1,109.77   | 983.98     | 841.32     | 919.46     | 1,029.12   | 1,634.38   |
| Zn      | 5,935.96  | 10,897.07  | 7,213.15   | 7,072.17   | 6,095.39   | 6,175.54   | 7,704.23   | 8,285.53   |
| As      | 1.26      | 9.86       | 4.18       | 2.75       | 1.56       | 1.96       | 4.81       | 8.76       |
| Se      | 53.30     | 93.70      | 72.82      | 70.86      | 58.71      | 66.53      | 79.10      | 89.32      |
| Sr      | 4.80      | 13.84      | 7.83       | 7.33       | 5.95       | 6.34       | 9.48       | 9.89       |
| Cd      | <LOD*     | 0.52       | 0.12       | 0.08       | 0.03       | 0.04       | 0.14       | 0.29       |
| Cs      | 7.63      | 18.12      | 13.62      | 14.36      | 8.77       | 11.21      | 16.42      | 17.43      |
| Ba      | 0.13      | 2.73       | 1.06       | 0.79       | 0.41       | 0.61       | 1.18       | 2.67       |
| Hg      | 0.29      | 3.32       | 0.96       | 0.64       | 0.32       | 0.39       | 1.39       | 1.73       |
| Pb      | 7.04      | 41.76      | 17.02      | 14.59      | 8.03       | 10.15      | 21.66      | 26.08      |
| U       | <LOD*     | <LOD*      | <LOD*      | <LOD*      | <LOD*      | <LOD*      | <LOD*      | <LOD*      |

\* LOD indicates values below the detection limit.



**Table S8.** Concentrations ( $\mu\text{g g}^{-1}$  creatinine) of chemical elements in urinary.

[illegible]

**Table S9.** Relation ( $\mu\text{g L}^{-1}$ ) between elements in miners' urine and age groups.

| Age group (years) | n  | Li           | Be           | Al           | Ca               | Cr          | Mn          | Fe           | Co           | Ni          | Cu           | Zn            | As           | Se           | Sr            | Cd          | Cs           | Ba           | Hg           | Pb          | U    |
|-------------------|----|--------------|--------------|--------------|------------------|-------------|-------------|--------------|--------------|-------------|--------------|---------------|--------------|--------------|---------------|-------------|--------------|--------------|--------------|-------------|------|
| 20-30             | 1  | 7.21         | 0.292        | 12.68        | 43736.14         | <b>0.52</b> | 0.22        | 11.36        | 0.318        | 0.73        | 54.27        | 172.84        | 17.73        | <b>31.02</b> | 73.64         | 0.10        | <b>39.53</b> | 1.076        | 1.11         | 0.00        | 0.00 |
| 30-40             | 1  | 36.52        | 0.089        | 0.00         | <b>144433.24</b> | 0.15        | 0.23        | 15.64        | 0.699        | 3.82        | 50.66        | 546.09        | <b>32.16</b> | 24.44        | <b>237.87</b> | 0.07        | 27.28        | 5.726        | <b>11.50</b> | 2.38        | 0.00 |
| 40-50             | 3  | 12.34        | 0.259        | 21.06        | 68027.37         | 0.29        | 0.50        | 17.09        | 0.643        | 3.35        | 58.29        | 372.67        | 25.31        | 25.06        | 141.67        | 0.17        | 25.49        | 2.065        | 4.10         | 1.47        | 0.00 |
| 50-60             | 12 | 27.41        | <b>0.294</b> | <b>44.97</b> | 96837.02         | 0.42        | <b>0.88</b> | 18.31        | 0.639        | 3.48        | <b>64.49</b> | <b>630.30</b> | 20.14        | 18.30        | 222.96        | 0.18        | 19.75        | 7.545        | 3.46         | 2.37        | 0.00 |
| 60-70             | 3  | <b>78.36</b> | 0.144        | 26.64        | 100571.70        | 0.42        | 0.75        | <b>34.16</b> | <b>0.737</b> | <b>3.88</b> | 50.26        | 626.55        | 17.53        | 21.77        | 235.45        | <b>0.27</b> | 27.33        | <b>9.171</b> | 3.27         | <b>6.99</b> | 0.00 |
| 70-80             | 2  | 17.74        | 0.204        | 20.11        | 82666.62         | 0.27        | 0.49        | 15.85        | 0.668        | 2.03        | 55.58        | 119.50        | 14.77        | 9.09         | 141.17        | 0.14        | 13.84        | 5.820        | 3.03         | 2.62        | 0.00 |

\*Bold indicates the maximum value in each age group

**Table S10.** Relation ( $\mu\text{g L}^{-1}$ ) between elements in miners' blood and age groups.

| Age group (years) | n  | Li          | Be          | Al          | Ca              | Cr          | Mn           | Fe               | Co           | Ni           | Cu             | Zn             | As          | Se           | Sr           | Cd          | Cs           | Ba           | Hg          | Pb            | U    |
|-------------------|----|-------------|-------------|-------------|-----------------|-------------|--------------|------------------|--------------|--------------|----------------|----------------|-------------|--------------|--------------|-------------|--------------|--------------|-------------|---------------|------|
| 20-30             | 1  | 0.28        | 0.00        | 0.00        | 52895.05        | 0.00        | <b>13.16</b> | 569634.89        | 0.473        | 0.00         | 980.42         | 6798.32        | <b>1.89</b> | <b>62.98</b> | 9.04         | 0.00        | 6.19         | 0.707        | <b>4.09</b> | <b>127.83</b> | 0.00 |
| 30-40             | 1  | 0.53        | 0.07        | 0.00        | 56935.92        | 0.31        | 10.06        | 583184.53        | 0.427        | 0.00         | 972.83         | 6610.94        | 1.30        | 49.63        | 8.43         | 0.08        | <b>11.34</b> | 1.769        | 2.57        | 41.93         | 0.00 |
| 40-50             | 3  | 0.46        | 0.27        | 0.00        | 54593.15        | 0.00        | 11.72        | 579976.52        | 0.365        | 1.95         | 1066.04        | 6934.40        | 1.38        | 55.51        | 9.19         | 0.13        | 6.17         | 0.725        | 1.06        | 68.13         | 0.00 |
| 50-60             | 12 | 0.72        | <b>0.19</b> | 5.03        | 53823.18        | 0.09        | 13.57        | <b>609528.76</b> | 0.430        | <b>26.08</b> | 1024.05        | <b>7476.80</b> | 1.44        | 53.54        | 11.87        | 0.15        | 7.11         | 1.634        | 0.58        | 67.85         | 0.00 |
| 60-70             | 3  | <b>1.67</b> | 0.18        | <b>6.75</b> | 55196.04        | 0.41        | 11.81        | 582534.39        | <b>0.489</b> | 2.24         | <b>1231.44</b> | 6488.31        | 1.32        | 58.72        | <b>12.21</b> | <b>0.20</b> | 10.25        | <b>1.784</b> | 0.58        | 112.07        | 0.00 |
| 70-80             | 2  | 0.56        | 0.00        | 0.00        | <b>57206.33</b> | <b>1.79</b> | 13.09        | 481565.41        | 0.484        | 5.23         | 1121.91        | 6710.40        | 1.62        | 42.73        | 10.94        | 0.13        | 6.03         | 1.240        | 0.31        | 54.60         | 0.00 |

\*Bold indicates the maximum value in each age group

**Table S11.** Relation ( $\mu\text{g L}^{-1}$ ) between elements in miners' urine and working time.

| Working time (years) | n | Li           | Be          | Al           | Ca               | Cr          | Mn          | Fe           | Co          | Ni          | Cu           | Zn            | As           | Se           | Sr            | Cd          | Cs           | Ba           | Hg          | Pb          | U    |
|----------------------|---|--------------|-------------|--------------|------------------|-------------|-------------|--------------|-------------|-------------|--------------|---------------|--------------|--------------|---------------|-------------|--------------|--------------|-------------|-------------|------|
| 0 - 5                | 1 | 7.21         | 0.29        | 12.68        | 43736.14         | <b>0.52</b> | 0.22        | 11.36        | 0.32        | 0.73        | 54.27        | 172.84        | 17.73        | <b>31.02</b> | 73.64         | 0.10        | <b>39.53</b> | 1.08         | 1.11        | 0.00        | 0.00 |
| 5 - 10               | 3 | 29.25        | 0.19        | 25.54        | 123470.33        | 0.31        | 0.52        | 12.26        | 0.62        | <b>4.34</b> | 54.46        | 646.69        | 21.41        | 19.08        | 255.02        | 0.07        | 21.89        | 6.25         | <b>8.01</b> | 0.95        | 0.00 |
| 10 - 15              | 3 | 28.85        | 0.23        | 15.96        | <b>140695.56</b> | 0.49        | 0.43        | 21.01        | 0.72        | 3.46        | 54.61        | 626.34        | 20.89        | 23.95        | <b>294.30</b> | 0.22        | 24.14        | 7.08         | 4.04        | 3.53        | 0.00 |
| 15 - 20              | 3 | 13.62        | 0.23        | 31.74        | 92345.21         | 0.39        | 0.75        | 14.25        | 0.64        | 2.97        | 67.36        | <b>771.14</b> | 14.09        | 15.98        | 185.53        | <b>0.25</b> | 19.21        | 4.89         | 4.54        | 2.79        | 0.00 |
| 20 - 30              | 4 | <b>54.34</b> | <b>0.30</b> | 38.11        | 87252.03         | 0.33        | 0.79        | <b>34.17</b> | 0.58        | 3.45        | 55.99        | 429.82        | 23.02        | 18.17        | 220.44        | 0.20        | 23.51        | <b>12.56</b> | 4.42        | <b>6.15</b> | 0.00 |
| 30 - 40              | 6 | 36.85        | 0.29        | 39.19        | 68573.45         | 0.37        | 0.48        | 15.03        | <b>0.83</b> | 3.76        | <b>70.11</b> | 549.92        | <b>26.35</b> | 22.93        | 166.90        | 0.19        | 23.39        | 4.27         | 1.25        | 1.70        | 0.00 |
| 40 -50               | 2 | 9.72         | 0.17        | <b>57.89</b> | 73812.89         | 0.36        | <b>2.20</b> | 25.71        | 0.31        | 1.36        | 43.72        | 97.50         | 6.26         | 7.75         | 119.70        | 0.14        | 10.16        | 5.55         | 3.13        | 2.42        | 0.00 |

\*Bold indicates the maximum value in each age group

**Table S12.** Relation ( $\mu\text{g L}^{-1}$ ) between elements in miners' blood and working time.

| Working time (years) | N | Li          | Be           | Al           | Ca              | Cr          | Mn           | Fe               | Co           | Ni           | Cu             | Zn             | As          | Se           | Sr           | Cd           | Cs          | Ba          | Hg          | Pb            | U    |
|----------------------|---|-------------|--------------|--------------|-----------------|-------------|--------------|------------------|--------------|--------------|----------------|----------------|-------------|--------------|--------------|--------------|-------------|-------------|-------------|---------------|------|
| 0 - 5                | 1 | 0.28        | 0.000        | 0.00         | 52895.05        | 0.00        | 13.16        | 569634.89        | 0.473        | 0.00         | 980.42         | 6798.32        | <b>1.89</b> | <b>62.98</b> | 9.04         | 0.000        | 6.19        | 0.71        | <b>4.09</b> | <b>127.83</b> | 0.00 |
| 5 - 10               | 3 | 0.55        | 0.150        | 0.00         | 51708.96        | 0.10        | 11.27        | 604320.51        | 0.407        | 0.00         | 999.95         | 7394.31        | 1.41        | 54.84        | 9.81         | 0.108        | <b>9.26</b> | 1.07        | 1.06        | 35.88         | 0.00 |
| 10 - 15              | 3 | 0.60        | <b>0.231</b> | 1.57         | 55434.99        | 0.02        | 11.22        | 588018.45        | 0.494        | 0.00         | 1112.06        | <b>7661.38</b> | 1.11        | 60.70        | 11.53        | 0.163        | 7.93        | 0.84        | 0.52        | 71.98         | 0.00 |
| 15 - 20              | 3 | 0.52        | 0.110        | 0.00         | <b>58011.23</b> | 0.18        | 12.00        | 598673.46        | 0.353        | 5.81         | 1054.13        | 7202.76        | 1.29        | 52.24        | 11.14        | 0.064        | 6.51        | 0.77        | 0.67        | 63.24         | 0.00 |
| 20 - 30              | 4 | <b>1.30</b> | 0.227        | 1.74         | 53973.27        | 0.15        | 12.33        | <b>605198.10</b> | 0.412        | 2.09         | 984.13         | 7323.04        | 1.44        | 53.11        | 12.03        | 0.107        | 7.38        | 1.76        | 0.64        | 109.56        | 0.00 |
| 30 - 40              | 6 | 0.92        | 0.175        | <b>11.49</b> | 53807.86        | <b>0.79</b> | <b>15.78</b> | 570567.91        | <b>0.505</b> | <b>51.63</b> | 1102.18        | 6572.97        | 1.59        | 49.81        | <b>12.23</b> | <b>0.207</b> | 7.04        | <b>2.45</b> | 0.85        | 71.85         | 0.00 |
| 40 -50               | 2 | 0.50        | 0.160        | 0.00         | 56194.24        | 0.00        | 11.10        | 565478.05        | 0.343        | 0.20         | <b>1174.87</b> | 7258.12        | 1.64        | 52.85        | 9.01         | 0.205        | 7.56        | 0.81        | 0.29        | 61.61         | 0.00 |

---

\*Bold indicates the maximum value in each age group
